# Supplementary material
Source: PubMed Central journal article supplement (PMC6865303)
Supplement: jamadermatol-156-57-s001.pdf [file jamadermatol-156-57-s001.pdf]

## Supplementary Online Content

Paulson KG, Gupta D, Kim TS, et al. Age-specific incidence of melanoma in the United States. *JAMA Dermatol*. Published online November 13, 2019.  
doi:10.1001/jamadermatol.2019.3353

**eFigure.** Melanoma Incidence Rate in the USA From 2001-2015

This supplementary material has been provided by the authors to give readers additional information about their work.

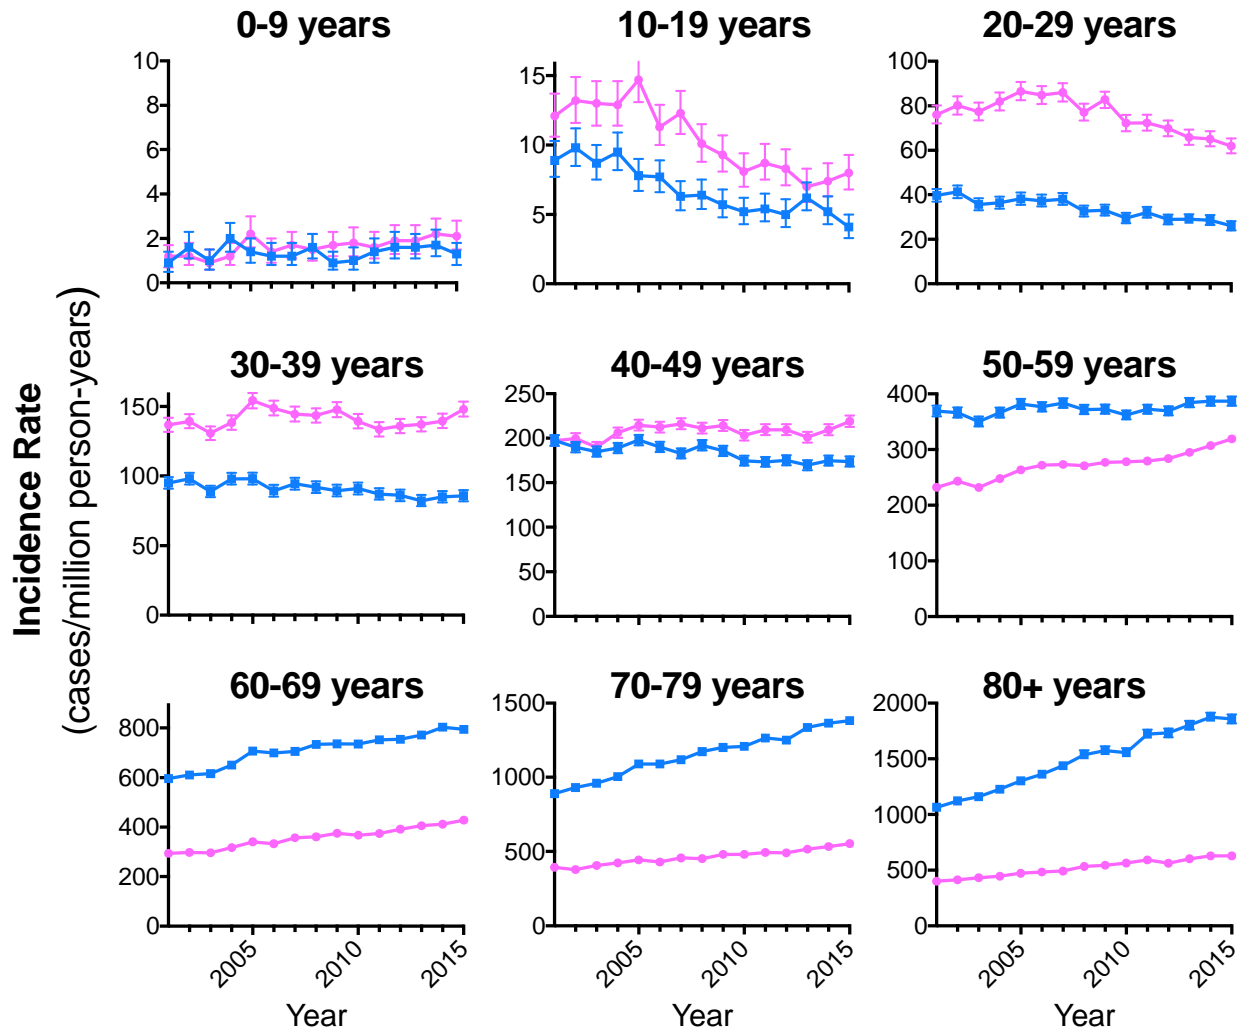

**eFigure.** Melanoma incidence rate in the USA from 2001-2015, U.S. Cancer Statistics. Blue squares = males, pink circles = females. Age groups from 0-39 years reproduced from figure 1B for clarity across figures. Bars represent 95% confidence intervals. Please note change in axis scale between age groups.
